# Supplementary material
Source: ML conference proceedings conference paper supplement (https://proceedings.neurips.cc/paper_files/paper/2021/hash/488b084119a1c7a4950f00706ec7ea16-Abstract.html)
Supplement: Supplementary file 1 [file 488b084119a1c7a4950f00706ec7ea16-Supplemental.pdf]

---

# Supplementary Material for Machine Learning for Variance Reduction in Online Experiments

---

**Yongyi Guo**

Department of Operations Research and Financial Engineering  
Princeton University  
Princeton, NJ 08544  
yongyig@princeton.edu

**Dominic Coey**

Facebook  
1 Hacker Way, Menlo Park, CA 94025  
coey@fb.com

**Mikael Konutgan**

Facebook  
1 Hacker Way, Menlo Park, CA 94025  
kmikael@fb.com

**Wenting Li**

Facebook  
1 Hacker Way, Menlo Park, CA 94025  
wentingli@fb.com

**Chris Schoener**

Facebook  
1 Hacker Way, Menlo Park, CA 94025  
chrissc@fb.com

**Matt Goldman**

Facebook  
1 Hacker Way, Menlo Park, CA 94025  
mattgoldman@fb.com

In this supplementary material, we provide the proof of all theoretical results stated in the paper.

## 1 Proof of Proposition 1

For any (deterministic)  $g \in \mathcal{G}$ , we have

$$P[Z(g)Z(g)^\top] = M_1(g) \otimes M_2,$$

where  $\otimes$  denotes the Kronecker product,

$$M_1(g) = \begin{pmatrix} 1 & Eg(X) \\ Eg(X) & Eg(X)^2 \end{pmatrix}, \quad M_2 = \begin{pmatrix} 1 & p \\ p & p \end{pmatrix}.$$

Therefore, any eigenvalue of  $P[Z(g)Z(g)^\top]$  is the product of one eigenvalue of  $M_1(g)$  and one eigenvalue of  $M_2$ . It's easy to verify from Assumption 1 that all eigenvalues of  $M_1(g)$  and  $M_2$  are nonnegative and bounded. Thus, we only need to show  $\inf_{g \in \mathcal{G}} \lambda_{\min}(M_1(g)) > 0$ ,  $\lambda_{\min}(M_2) > 0$ .

Through some calculations, one can find out that

$$\begin{aligned} \lambda_{\min}(M_1(g)) &= \frac{1}{2} \left\{ (Eg(X)^2 + 1) - \sqrt{(Eg(X)^2 + 1)^2 - 4\text{Var}(g(X))} \right\} \\ &= \frac{2\text{Var}(g(X))}{(Eg(X)^2 + 1) + \sqrt{(Eg(X)^2 + 1)^2 - 4\text{Var}(g(X))}} \geq \frac{\text{Var}(g(X))}{Eg(X)^2 + 1}, \end{aligned}$$

which leads to

$$\inf_{g \in \mathcal{G}} \lambda_{\min}(M_1(g)) \geq \frac{\inf_{g \in \mathcal{G}} \text{Var}(g(X))}{\sup_{g \in \mathcal{G}} \text{E}g(X)^2 + 1} > 0.$$

On the other hand,  $\lambda_{\min}(M_2) > 0$  can be deduced from  $p \in (0, 1)$ . By combining the above two inequalities, we conclude the proof.

## 2 Proof of Proposition 2

For compactness we may write the random variables  $Z(\hat{g}_k)$  as  $\hat{Z}_k$  and  $Z(g_0)$  as  $Z$ . Similarly for any observation  $i$  we write  $Z_i(\hat{g}_k)$  as  $\hat{Z}_{k,i}$  and  $Z_i(g_0)$  as  $Z_i$ . We are only interested in convergence in probability, so we can assume that the inverse matrices in the definition of  $\hat{\beta}(\{\hat{g}_k\}_{k=1}^K)$  and  $\hat{\beta}(g_0)$  exist, as this happens with probability approaching 1 according to Lemma 2. We have  $\hat{\beta}(\{\hat{g}_k\}_{k=1}^K) - \beta(\{\hat{g}_k\}_{k=1}^K) = A + B$ , where

$$A = \underbrace{\left[ \frac{1}{N} \sum_k \sum_{i \in I_k} \hat{Z}_{k,i} \hat{Z}_{k,i}^\top \right]^{-1} - \left[ \frac{1}{K} \sum_k P[\hat{Z}_k \hat{Z}_k^\top] \right]^{-1}}_{F_0} \cdot \left[ \frac{1}{N} \sum_k \sum_{i \in I_k} \hat{Z}_{k,i} Y_i \right],$$

and

$$B = \left[ \frac{1}{K} \sum_k P[\hat{Z}_k \hat{Z}_k^\top] \right]^{-1} \underbrace{\left[ \frac{1}{N} \sum_k \sum_{i \in I_k} [\hat{Z}_{k,i} Y_i - P[\hat{Z}_k Y]] \right]}_{G_0}.$$

Similarly,  $\hat{\beta}(g_0) - \beta(g_0) = C + D$ , where

$$C = \underbrace{\left[ \frac{1}{N} \sum_i Z_i Z_i^\top \right]^{-1} - [P[ZZ^\top]]^{-1}}_{F_1} \left[ \frac{1}{N} \sum_i Z_i Y_i \right]$$

and

$$D = [P[ZZ^\top]]^{-1} \underbrace{\left[ \frac{1}{N} \sum_i [Z_i Y_i - P[ZY]] \right]}_{G_1}.$$

We can write  $[\hat{\beta}(\{\hat{g}_k\}_{k=1}^K) - \beta(\{\hat{g}_k\}_{k=1}^K)] - [\hat{\beta}(g_0) - \beta(g_0)] = A - C + B - D$ . We show that  $\sqrt{N}\|A - C\| \rightarrow_p 0$  and  $\sqrt{N}\|B - D\| \rightarrow_p 0$ . From the definitions of  $F_0$  and  $F_1$  above, we have  $A - C = [F_0 - F_1] \left[ \frac{1}{N} \sum_k \sum_{i \in I_k} \hat{Z}_{k,i} Y_i \right] + F_1 \left[ \frac{1}{N} \sum_k \sum_{i \in I_k} (\hat{Z}_{k,i} - Z_i) Y_i \right]$ . If

1.  $\left\| \sqrt{N}[F_0 - F_1] \right\| = o_p(1)$
2.  $\left\| \frac{1}{N} \sum_k \sum_{i \in I_k} \hat{Z}_{k,i} Y_i \right\| = O_p(1)$
3.  $\left\| \sqrt{N}F_1 \right\| = O_p(1)$
4.  $\left\| \frac{1}{N} \sum_k \sum_{i \in I_k} (\hat{Z}_{k,i} - Z_i) Y_i \right\| = o_p(1)$ ,

then  $\sqrt{N}\|A - C\| = o_p(1)$  as desired. Similarly we write  $B - D$  as  $B - D = \left[ \frac{1}{K} \sum_k P[\hat{Z}_k \hat{Z}_k^\top] \right]^{-1} - [P[ZZ^\top]]^{-1} G_0 + [P[ZZ^\top]]^{-1} [G_0 - G_1]$ . If

5.  $\left\| \left[ \frac{1}{K} \sum_k P[\hat{Z}_k \hat{Z}_k^\top] \right]^{-1} - [P[ZZ^\top]]^{-1} \right\| = o_p(1)$

6.  $\left\| \sqrt{N}G_0 \right\| = O_p(1)$
7.  $\left\| P[ZZ^\top]^{-1} \right\| = O_p(1)$
8.  $\left\| \sqrt{N}[G_0 - G_1] \right\| = o_p(1)$

then  $\sqrt{N} \|B - D\| = o_p(1)$  as desired. We complete the proof in 8 steps by showing statements 1 - 8 above.

**Step 1.** We apply Lemma 3 by letting  $M_{1n} = \frac{1}{N} \sum_k \sum_{i \in I_k} \widehat{Z}_{k,i} \widehat{Z}_{k,i}^\top$ ,  $B_n = M_{2n} = P[ZZ^\top]$ ,  $A_n = M_{3n} = \frac{1}{K} \sum_k P[\widehat{Z}_k \widehat{Z}_k^\top]$ ,  $M_{4n} = \frac{1}{N} \sum_k \sum_{i \in I_k} Z_i Z_i^\top$ . Consequently, Step 1 amounts to verifying the conditions of Lemma 3. In fact, these conditions are guaranteed by Lemma 1 as well as the following fact: For each  $k = 1, \dots, K$ ,

$$\left\| \frac{1}{\sqrt{n}} \sum_{i \in I_k} \left[ \widehat{Z}_{k,i} \widehat{Z}_{k,i}^\top - P[\widehat{Z}_k \widehat{Z}_k^\top] - Z_i Z_i^\top + P[ZZ^\top] \right] \right\| \rightarrow_p 0. \quad (1)$$

We now prove (1). Define  $W_{k,i} = \widehat{Z}_{k,i} \widehat{Z}_{k,i}^\top - P[\widehat{Z}_k \widehat{Z}_k^\top] - Z_i Z_i^\top + P[ZZ^\top]$ , and note that conditional on the data in  $I_k^c$ , the function  $\widehat{g}_k$  is non-random, and the  $W_{k,i}$  are mean zero matrices, uncorrelated across observations in  $I_k$ . With slight abuse of notation, we use  $E[\cdot \mid I_k^c]$  to denote expectations conditional on the observations with indices belonging to the set  $I_k^c$ . For any  $k = 1, 2, \dots, K$ ,

$$E \left[ \left\| \frac{1}{\sqrt{n}} \sum_{i \in I_k} W_{k,i} \right\|^2 \middle| I_k^c \right] = \frac{1}{n} E \left[ \text{tr} \left( \sum_{i,j \in I_k} W_{k,i}^\top W_{k,j} \right) \middle| I_k^c \right] \quad (2)$$

$$= \frac{1}{n} E \left[ \sum_{i \in I_k} \text{tr} (W_{k,i}^\top W_{k,i}) \middle| I_k^c \right] \quad (3)$$

$$\leq \frac{1}{n} E \left[ \sum_{i \in I_k} \left\| (\widehat{Z}_{k,i} \widehat{Z}_{k,i}^\top - Z_i Z_i^\top) \right\|^2 \middle| I_k^c \right] \quad (4)$$

$$= P \left[ \left\| \widehat{Z}_k \widehat{Z}_k^\top - ZZ^\top \right\|^2 \right]. \quad (5)$$

If the RHS of (5) is  $o_p(1)$ , we can use Lemma 6.1 of [1] to conclude that  $\left\| \frac{1}{\sqrt{n}} \sum_{i \in I_k} W_{k,i} \right\|$  is  $o_p(1)$  as required. Some calculations give

$$\left\| \widehat{Z}_k \widehat{Z}_k^\top - ZZ^\top \right\|^2 \leq 12[(\widehat{g}_k(X) - g_0(X))^2 + (\widehat{g}_k(X)^2 - g_0(X)^2)^2]. \quad (6)$$

Then  $P[(\widehat{g}_k - g_0)^2] \leq \sqrt{P[(\widehat{g}_k - g_0)^4]} \rightarrow_p 0$ . Also

$$P[(\widehat{g}_k^2 - g_0^2)^2] = P[(\widehat{g}_k - g_0)^2(\widehat{g}_k + g_0)^2] \quad (7)$$

$$\leq \sqrt{P[(\widehat{g}_k - g_0)^4]} \sqrt{P[(\widehat{g}_k + g_0)^4]} \quad (8)$$

$$\leq \sqrt{P[(\widehat{g}_k - g_0)^4]} \sqrt{\sup_{g \in \mathcal{G}} P[g^4]} \quad (9)$$

$$\rightarrow_p 0, \quad (10)$$

where the second-to-last line follows because  $\widehat{g}_k + g_0 \in \mathcal{G}$  as  $\mathcal{G}$  is a vector space. We conclude from (6) that the RHS of (5) is  $o_p(1)$ .

**Step 2.** By the Cauchy-Schwarz inequality,

$$\left\| \frac{1}{N} \sum_k \sum_{i \in I_k} Z_i(\widehat{g}_k) Y_i \right\| \leq \sqrt{\frac{1}{N} \sum_k \sum_{i \in I_k} \|Z_i(\widehat{g}_k)\|^2} \sqrt{\frac{1}{N} \sum_k \sum_{i \in I_k} Y_i^2}. \quad (11)$$

As  $E[Y^2] < \infty$ , the second term on the RHS is  $O_p(1)$  by Markov's inequality. Also for  $i \in I_k$ ,  $E[\|Z_i(\widehat{g}_k)\|^2] = E[1 + T_i + \widehat{g}_k(X_i)^2 + T_i \widehat{g}_k(X_i)^2] \leq \sup_{g \in \mathcal{G}} E[2[1 + g(X_i)^2]] < \infty$ , and by Markov's inequality the first term on the RHS is also  $O_p(1)$ .

**Step 3.** By the central limit theorem,  $\sqrt{N} \left[ \sum_i \frac{Z_i Z_i^\top}{N} - P[ZZ^\top] \right]$  is asymptotically normal. By the delta method and invertibility of  $P[ZZ^\top]$ ,  $\sqrt{N} \left[ \left[ \sum_i \frac{Z_i Z_i^\top}{N} \right]^{-1} - P[ZZ^\top]^{-1} \right]$  is also, and hence its norm is  $O_p(1)$ .

**Step 4.** We show that for any  $k$ ,  $\frac{1}{n} \sum_{i \in I_k} (\hat{g}_k(X_i) - g_0(X_i)) Y_i = o_p(1)$ , from which the result follows. By Cauchy-Schwarz,

$$\frac{1}{n} \sum_{i \in I_k} (\hat{g}_k(X_i) - g_0(X_i)) Y_i \leq \sqrt{\frac{1}{n} \sum_{i \in I_k} (\hat{g}_k(X_i) - g_0(X_i))^2} \sqrt{\frac{1}{n} \sum_{i \in I_k} Y_i^2}.$$

As  $Y$  has finite second moment by assumption, it remains to show the first term on the RHS is  $o_p(1)$ . We have

$$\frac{1}{n} \sum_{i \in I_k} (\hat{g}_k(X_i) - g_0(X_i))^2 = \frac{1}{n} \sum_{i \in I_k} [(\hat{g}_k(X_i) - g_0(X_i))^2 - P[(\hat{g}_k - g_0)^2]] + P[(\hat{g}_k - g_0)^2]. \quad (12)$$

From Lemma 6.1 in [1], the first term on the RHS in (12) is  $o_p(1)$  and by the convergence assumption on  $\hat{g}_k$ , the second term is too.

**Step 5.** By the continuous mapping theorem it suffices to show that  $\left\| \frac{1}{K} \sum_k [P[Z(\hat{g}_k)Z(\hat{g}_k)^\top] - P[Z(g_0)Z(g_0)^\top]] \right\| = o_p(1)$ . From the argument in Step 1, both  $P[(\hat{g}_k - g_0)^2]$  and  $P[(\hat{g}_k^2 - g_0^2)^2]$  are  $o_p(1)$  for all  $k$ , and hence  $P[\hat{g}_k - g_0]$  and  $P[\hat{g}_k^2 - g_0^2]$  are both  $o_p(1)$  for all  $k$ . The other entries in the matrix are straightforwardly  $o_p(1)$ .

**Step 6.** This follows from Step 8 and the fact that by Chebyshev's inequality,  $\left\| \frac{1}{\sqrt{N}} \sum_i [Z_i Y_i - P[ZY]] \right\| = O_p(1)$ .

**Step 7.**  $P[ZZ^\top]$  is invertible by assumption.

**Step 8.** The reasoning here is similar to Step 1. For any  $k$  and  $i \in I_k$ , define  $W_{k,i} = \hat{Z}_{k,i} Y_i - P[\hat{Z}_k Y] - Z_i Y_i + P[ZY]$ , and note that conditional on the data in  $I_k^c$ , the  $W_{k,i}$  are mean zero matrices, uncorrelated across observations in  $I_k$ . Then

$$E \left[ \left\| \frac{1}{\sqrt{n}} \sum_{i \in I_k} W_{k,i} \right\|^2 \middle| I_k^c \right] \leq \frac{1}{n} E \left[ \sum_{i \in I_k} \left\| (\hat{Z}_{k,i} Y_i - Z_i Y_i) \right\|^2 \middle| I_k^c \right] = P \left[ \left\| \hat{Z}_k Y - ZY \right\|^2 \right].$$

Because  $P[(\hat{g}_k(X) - g_0(X))^2 Y^2] \leq \sqrt{P[(\hat{g}_k - g_0)^4]} \sqrt{P[Y^4]} \rightarrow_p 0$ , the RHS of (2) is  $o_p(1)$ . We use Lemma 6.1 of [1] to conclude that  $\left\| \frac{1}{\sqrt{n}} \sum_{i \in I_k} W_{k,i} \right\|$  is also  $o_p(1)$ , from which the result follows.

### 3 Proof of Theorem 1

We have

$$\hat{\alpha}_1(\{\hat{g}_k\}_{k=1}^K) - \hat{\alpha}_1(g_0) = \left[ \hat{\alpha}_1(\{\hat{g}_k\}_{k=1}^K) - \beta_1(\{\hat{g}_k\}_{k=1}^K) - \beta_3(\{\hat{g}_k\}_{k=1}^K) \frac{1}{K} \sum_{k=1}^K P\hat{g}_k \right] \quad (13)$$

$$- [\hat{\alpha}_1(g_0) - \beta_1(g_0) - \beta_3(g_0) P g_0] \quad (14)$$

$$= A + B, \quad (15)$$

where

$$A = [\hat{\beta}_1(\{\hat{g}_k\}_{k=1}^K) - \beta_1(\{\hat{g}_k\}_{k=1}^K)] - [\hat{\beta}_1(g_0) - \beta_1(g_0)], \quad (16)$$

and

$$B = \underbrace{\left[ \widehat{\beta}_3(\{\widehat{g}_k\}_{k=1}^K) \frac{1}{N} \sum_i \widehat{g}_{k(i)}(X_i) - \beta_3(\{\widehat{g}_k\}_{k=1}^K) \frac{1}{K} \sum_{k=1}^K P\widehat{g}_k \right]}_C \quad (17)$$

$$- \underbrace{\left[ \widehat{\beta}_3(g_0) \frac{1}{N} \sum_i g_0(X_i) - \beta_3(g_0) P g_0 \right]}_D.$$

Proposition 1 has established that  $A = o_p(1/\sqrt{N})$ . Moreover

$$C = \underbrace{\left( \widehat{\beta}_3(\{\widehat{g}_k\}_{k=1}^K) - \beta_3(\{\widehat{g}_k\}_{k=1}^K) \right) \frac{1}{N} \sum_i \widehat{g}_{k(i)}(X_i)}_{C_1} + \underbrace{\beta_3(\{\widehat{g}_k\}_{k=1}^K) \left( \frac{1}{N} \sum_i [\widehat{g}_{k(i)}(X_i) - P\widehat{g}_k] \right)}_{C_2}$$

and

$$D = \underbrace{\left( \widehat{\beta}_3(g_0) - \beta_3(g_0) \right) \frac{1}{N} \sum_i g_0(X_i)}_{D_1} + \underbrace{\left( \beta_3(g_0) \frac{1}{N} \sum_i [g_0(X_i) - P g_0] \right)}_{D_2}. \quad (19)$$

We show  $C_1 - D_1$  and  $C_2 - D_2$  are  $o_p(1/\sqrt{N})$  to conclude. In fact

$$C_1 - D_1 = \left( \widehat{\beta}_3(\{\widehat{g}_k\}_{k=1}^K) - \beta_3(\{\widehat{g}_k\}_{k=1}^K) - \widehat{\beta}_3(g_0) + \beta_3(g_0) \right) \frac{1}{N} \sum_i \widehat{g}_{k(i)}(X_i)$$

$$+ \left( \widehat{\beta}_3(g_0) - \beta_3(g_0) \right) \frac{1}{N} \sum_i [\widehat{g}_{k(i)}(X_i) - g_0(X_i)] = o_p(1/\sqrt{N}). \quad (20)$$

This is because

- $\widehat{\beta}_3(\{\widehat{g}_k\}_{k=1}^K) - \beta_3(\{\widehat{g}_k\}_{k=1}^K) - \widehat{\beta}_3(g_0) + \beta_3(g_0) = o_p(1/\sqrt{N})$  from Proposition 1;
- $\frac{1}{N} \sum_i \widehat{g}_{k(i)}(X_i) = \frac{1}{N} \sum_i g_0(X_i) + \frac{1}{N} \sum_i (\widehat{g}_{k(i)}(X_i) - g_0(X_i)) = O_p(1)$  from the LLN and the same logic bounding (12) above;
- $\widehat{\beta}_3(g_0) - \beta_3(g_0) = O_p(1/\sqrt{N})$  from the CLT and the fact that  $P(Z(g_0)Z(g_0)^\top)$  has all eigenvalues bounded away from 0;
- $\frac{1}{N} \sum_i (\widehat{g}_{k(i)}(X_i) - g_0(X_i)) = o_p(1)$  again from bounding argument applied to (12).

Similarly,

$$C_2 - D_2 = \beta_3(\{\widehat{g}_k\}_{k=1}^K) \left( \frac{1}{N} \sum_i [[\widehat{g}_{k(i)}(X_i) - P\widehat{g}_k] - [g_0(X_i) - P g_0]] \right)$$

$$+ \left( (\beta_3(\{\widehat{g}_k\}_{k=1}^K) - \beta_3(g_0)) \frac{1}{N} \sum_i [g_0(X_i) - P g_0] \right) = o_p(1/\sqrt{N}), \quad (21)$$

which results from the following facts:

- $\beta_3(\{\widehat{g}_k\}_{k=1}^K) = \beta_3(g_0) + (\beta_3(\{\widehat{g}_k\}_{k=1}^K) - \beta_3(g_0)) = O_p(1)$ ;
- $\frac{1}{N} \sum_i [[\widehat{g}_{k(i)}(X_i) - P\widehat{g}_k] - [g_0(X_i) - P g_0]] = o_p(1/\sqrt{N})$  from the same reasoning applied to bound (1);
- $\beta_3(\{\widehat{g}_k\}_{k=1}^K) - \beta_3(g_0) = o_p(1)$  due to convergence of  $\widehat{g}_k$  to  $g_0$ , continuity of  $\beta_3(\cdot)$ , and the continuous mapping theorem;
- $\frac{1}{N} \sum_i [g_0(X_i) - P g_0] = O_p(1/\sqrt{N})$  from the CLT.

Combining the above arguments, we conclude that  $B = o_p(1/\sqrt{N})$ .

## 4 Proof of Proposition 4

We first show that  $\widehat{Var}(\widehat{g}_{k(i)}(X_i)) \rightarrow_p \sigma_g^2$ . We have

$$\widehat{Var}(\widehat{g}_{k(i)}(X_i)) = \frac{1}{K} \sum_k \frac{1}{n} \sum_{i \in I_k} \widehat{g}_k(X_i)^2 - \left[ \frac{1}{K} \sum_k \frac{1}{n} \sum_{i \in I_k} \widehat{g}_k(X_i) \right]^2. \quad (22)$$

By the same logic as in Step 1 of the proof of Proposition 1, for each  $k = 1, 2, \dots, K$ ,

$$E \left[ \left\| \frac{1}{n} \sum_{i \in I_k} [\widehat{g}_k(X_i)^2 - P\widehat{g}_k^2] \right\|^2 \middle| I_k^c \right] \rightarrow_p 0,$$

and so  $\frac{1}{n} \sum_{i \in I_k} \widehat{g}_k(X_i)^2 - P\widehat{g}_k^2 \rightarrow_p 0$ . Since  $P\widehat{g}_k^2 \rightarrow_p P g_0^2$ , it follows that  $\frac{1}{n} \sum_{i \in I_k} \widehat{g}_k(X_i)^2 \rightarrow_p P g_0^2$ . Similarly  $\frac{1}{n} \sum_{i \in I_k} \widehat{g}_k(X_i) \rightarrow_p P g_0$ . Hence  $\widehat{Var}(\widehat{g}_{k(i)}(X_i)) \rightarrow_p \sigma_g^2$ . Also, by Proposition 1,

$$\left\| \widehat{\beta}(\{\widehat{g}_k\}_{k=1}^K) - \beta(\{\widehat{g}_k\}_{k=1}^K) \right\| \rightarrow_p 0 \quad (23)$$

and by continuity of  $\beta(\cdot)$  and the continuous mapping theorem,

$$\left\| \beta(\{\widehat{g}_k\}_{k=1}^K) - \beta(g_0) \right\| \rightarrow_p 0. \quad (24)$$

Consequently  $\left\| \widehat{\beta}(\{\widehat{g}_k\}_{k=1}^K) - \beta(g_0) \right\| \rightarrow_p 0$ . By the continuous mapping theorem, we conclude that  $\widehat{\sigma}^2 \rightarrow_p \sigma^2$ .

## 5 Proof of auxiliary lemmas

**Lemma 1.** *Given Assumption 1,*

$$\left\| \frac{1}{N} \sum_k \sum_{j \in I_k} \widehat{Z}_{k,j} \widehat{Z}_{k,j}^\top - \frac{1}{K} \sum_k P(\widehat{Z}_k \widehat{Z}_k^\top) \right\| = O_p(1/\sqrt{n}).$$

*Proof.* Since the number of splits  $K$  is bounded, we only need to verify for any  $k \in \{1, 2, \dots, K\}$ ,

$$\left\| \frac{1}{n} \sum_{j \in I_k} \widehat{Z}_{k,j} \widehat{Z}_{k,j}^\top - P(\widehat{Z}_k \widehat{Z}_k^\top) \right\| = O_p(1/\sqrt{n}).$$

Below we'll prove

$$\frac{1}{n} \sum_{j \in I_k} T_j^2 \widehat{g}_k^2(X_j) - E[T_j^2 \widehat{g}_k^2(X_j) | I_k^c] = O_p(1/\sqrt{n}). \quad (25)$$

The other terms can be derived in the similar manner.

First, since  $P(\widehat{g}_k - g_0)^4 \rightarrow_p 0$  as  $n \rightarrow \infty$ , we know that for any subsequence  $\{n_l\}$  of  $\mathbb{N}$ , it further has a subsequence  $\{n'_l\}$ , such that  $P(\widehat{g}_k - g_0)^4 \rightarrow 0$  a.s. as  $l \rightarrow \infty$ . Our next step is to prove

$$\frac{1}{\sqrt{n'_l}} \sum_{j \in I_k} T_j^2 \widehat{g}_k^2(X_j) - E[T_j^2 \widehat{g}_k^2(X_j) | I_k^c] = O_p(1) \quad (26)$$

as  $l \rightarrow \infty$ .

For notational simplicity, define  $V_{k,j} := T_j^2 \widehat{g}_k^2(X_j) - E[T_j^2 \widehat{g}_k^2(X_j) | I_k^c]$ . Since  $\{V_{k,j}\}_{j \in I_k}$  are independent conditioned on  $I_k^c$ , for any  $t \in \mathbb{R}$  we have

$$\begin{aligned} E \exp \left( it / \sqrt{n'_l} \cdot \sum_{j \in I_k} V_{k,j} \right) &= EE \left[ \exp \left( it / \sqrt{n'_l} \cdot \sum_{j \in I_k} V_{k,j} \right) \middle| I_k^c \right] \\ &= E \left\{ E \left[ \exp \left( it / \sqrt{n'_l} \cdot \sum_{j \in I_k} V_{k,j} \right) \middle| I_k^c \right] \right\}^{n'_l}. \end{aligned}$$

Furthermore,

$$\begin{aligned} \lim_{l \rightarrow \infty} E \exp \left( it / \sqrt{n'_l} \cdot \sum_{j \in I_k} V_{k,j} \right) &= \lim_{l \rightarrow \infty} E \left\{ E \left[ \exp \left( it / \sqrt{n'_l} \cdot V_{k,j} \right) \middle| I_k^c \right] \right\}^{n'_l} \\ &= E \lim_{l \rightarrow \infty} \left\{ E \left[ \exp \left( it / \sqrt{n'_l} \cdot V_{k,j} \right) \middle| I_k^c \right] \right\}^{n'_l}. \end{aligned} \quad (27)$$

Our goal is now to derive the limit in the last term so that we can infer the limiting distribution of  $1/\sqrt{n'_l} \cdot \sum_{j \in I_k} V_{k,j}$ .

First, we conduct the Taylor expansion

$$\exp \left( it / \sqrt{n'_l} \cdot V_{k,j} \right) = 1 + it \cdot \sqrt{n'_l} \cdot V_{k,j} - \frac{t^2}{2n'_l} V_{k,j}^2 + R_{k,j}.$$

Here

$$R_{k,j} = \exp \left( it / \sqrt{n'_l} \cdot V_{k,j} \right) - \left[ 1 + it / \sqrt{n'_l} \cdot V_{k,j} - \frac{t^2}{2n'_l} V_{k,j}^2 \right].$$

Thus

$$\begin{aligned} E \left[ \exp \left( it / \sqrt{n'_l} \cdot V_{k,j} \right) \middle| I_k^c \right] &= 1 + it / \sqrt{n'_l} \cdot E[V_{k,j} | I_k^c] - \\ &\frac{t^2}{2n'_l} E[V_{k,j}^2 | I_k^c] + E[R_{k,j} | I_k^c] = 1 - \frac{t^2}{2n'_l} E[V_{k,j}^2 | I_k^c] + E[R_{k,j} | I_k^c] \end{aligned} \quad (28)$$

First, with probability 1,

$$\begin{aligned} \lim_{l \rightarrow \infty} E[V_{k,j}^2 | I_k^c] &= \lim_{l \rightarrow \infty} \left\{ E[T_j^4 \widehat{g}_k^4(X_j) | I_k^c] - E[T_j^2 \widehat{g}_k^2(X_j) | I_k^c]^2 \right\} \\ &= p \cdot P g_0^4 - p^2 \cdot (P g_0^2)^2. \end{aligned} \quad (29)$$

Next, we bound  $|E[R_{k,j} | I_k^c]|$ . In fact,

$$R_{k,j} \leq \begin{cases} \frac{2t^3}{n'_l{}^{3/2}} V_{k,j}^3 & \text{when } |V_{k,j}| \leq \frac{\sqrt{n'_l}}{2t}, \\ 2 + \frac{t}{\sqrt{n'_l}} |V_{k,j}| + \frac{t^2}{2n'_l} |V_{k,j}|^2 & \text{otherwise.} \end{cases}$$

This means

$$|E[R_{k,j} | I_k^c]| \leq E[R_{k,j}^{(1)} | I_k^c] + E[R_{k,j}^{(2)} | I_k^c],$$

where  $R_{k,j}^{(1)} = \frac{2t^3}{n'_l{}^{3/2}} |V_{k,j}|^3 \mathbf{1}_{\{|V_{k,j}| \leq \sqrt{n'_l}/(2t)\}}$ ,

$R_{k,j}^{(2)} = \left( 2 + \frac{t}{\sqrt{n'_l}} |V_{k,j}| + \frac{t^2}{2n'_l} |V_{k,j}|^2 \right) \mathbf{1}_{\{|V_{k,j}| > \sqrt{n'_l}/(2t)\}}$ .

On the one hand,

$$\begin{aligned} E[R_{k,j}^{(1)} | I_k^c] &\leq \frac{2t^3}{n'_l{}^{3/2}} E \left[ |V_{k,j}|^{2+\delta/2} \cdot \left( \sqrt{n'_l}/2t \right)^{1-\delta/2} \middle| I_k^c \right] \\ &= \frac{2^{\delta/2} t^{2+\delta/2}}{n'_l{}^{1+\delta/4}} E \left[ |T_j^2 \widehat{g}_k^2(X_j) - E T_j^2 \widehat{g}_k^2(X_j)|^{2+\delta/2} \middle| I_k^c \right] \leq \frac{2^{2+\delta} t^{2+\delta/2}}{n'_l{}^{1+\delta/4}} P |\widehat{g}_k|^{4+\delta}. \end{aligned}$$

On the other hand, by Markov's inequality,

$$\begin{aligned} E[R_{k,j}^{(2)} | I_k^c] &\leq 2E \left[ \left( 2t / \sqrt{n'_l} \right)^{2+\delta/2} |V_{k,j}|^{2+\delta/2} \middle| I_k^c \right] + t / \sqrt{n'_l} \cdot \\ &E \left[ |V_{k,j}| \cdot \left( 2t / \sqrt{n'_l} \right)^{1+\delta/2} |V_{k,j}|^{1+\delta/2} \middle| I_k^c \right] + \frac{t^2}{2n'_l} \cdot \\ &E \left[ |V_{k,j}|^2 \cdot \left( 2t / \sqrt{n'_l} \right)^{\delta/2} |V_{k,j}|^{\delta/2} \middle| I_k^c \right] \leq \frac{2^{6+\delta} t^{2+\delta/2}}{n'_l{}^{1+\delta/4}} P |\widehat{g}_k|^{4+\delta}. \end{aligned}$$

Combining the above two bounds, we deduce that

$$|E[R_{k,j}|I_k^c]| \leq \frac{2^{7+\delta} t^{2+\delta/2}}{n_l^{1+\delta/4}} P|\widehat{g}_k|^{4+\delta}.$$

Thus with probability 1,  $E[R_{k,j}|I_k^c] = o(1/n_l')$ .

Combining the above bound, (28) and (29), we obtain that with probability 1,

$$\begin{aligned} & \lim_{l \rightarrow \infty} n_l' \log E \left[ \exp \left( it / \sqrt{n_l'} \cdot V_{k,j} \right) \middle| I_k^c \right] \\ &= \lim_{l \rightarrow \infty} n_l' \log \left( 1 - \frac{t^2}{2n_l'} E[V_{k,j}^2 | I_k^c] + E[R_{k,j} | I_k^c] \right) \\ &= - \frac{t^2}{2n_l'} [p \cdot P g_0^4 - p^2 \cdot (P g_0^2)^2]. \end{aligned}$$

Finally we plug the above into (27) and conclude that

$$\lim_{l \rightarrow \infty} E \exp \left( it / \sqrt{n_l'} \cdot \sum_{j \in I_k} V_{k,j} \right) = \exp \left\{ - \frac{t^2}{2n_l'} [p \cdot P g_0^4 - p^2 \cdot (P g_0^2)^2] \right\}.$$

This implies that  $\frac{1}{\sqrt{n_l'}} \sum_{j \in I_k} V_{k,j}$  converges in distribution to a centered normal random variable with variance  $p \cdot P g_0^4 - p^2 \cdot (P g_0^2)^2$ , and (26) follows.

Finally, since for any subsequence  $\{n_l\}$  of  $\mathbb{N}$ , it further has a subsequence  $\{n_l'\}$  such that (26) holds, it can only be the case that (25) is true. □

**Lemma 2.** *The following hold with probability tending to 1:*

$$\lambda_{\min} \left( \frac{1}{n} \sum_{i \in I_k} \widehat{Z}_{k,i} \widehat{Z}_{k,i}^\top \right) \geq \frac{1}{2} \inf_{g \in \mathcal{G}} \lambda_{\min}(P[Z(g)Z(g)^\top]) \quad \forall k \in \{1, 2, \dots, K\}; \quad (30)$$

$$\lambda_{\min} \left( \frac{1}{N} \sum_{i=1}^N \widehat{Z}_i \widehat{Z}_i^\top \right) \geq \frac{1}{2} \inf_{g \in \mathcal{G}} \lambda_{\min}(P[Z(g)Z(g)^\top]). \quad (31)$$

*Proof.* According to Weyl's inequality,

$$\begin{aligned} \lambda_{\min} \left( \frac{1}{n} \sum_{i \in I_k} \widehat{Z}_{k,i} \widehat{Z}_{k,i}^\top \right) &\geq \lambda_{\min}(P(\widehat{Z}_k \widehat{Z}_k^\top)) - \left\| \frac{1}{n} \sum_{j \in I_k} \widehat{Z}_{k,j} \widehat{Z}_{k,j}^\top - P(\widehat{Z}_k \widehat{Z}_k^\top) \right\| \\ &\geq \inf_{g \in \mathcal{G}} \lambda_{\min}(P[Z(g)Z(g)^\top]) - \left\| \frac{1}{n} \sum_{j \in I_k} \widehat{Z}_{k,j} \widehat{Z}_{k,j}^\top - P(\widehat{Z}_k \widehat{Z}_k^\top) \right\|. \end{aligned}$$

On the other hand, from the proof of Lemma 1 we know

$$\left\| \frac{1}{n} \sum_{j \in I_k} \widehat{Z}_{k,j} \widehat{Z}_{k,j}^\top - P(\widehat{Z}_k \widehat{Z}_k^\top) \right\| = O_p(1/\sqrt{n}).$$

This implies that

$$\lim_{n \rightarrow \infty} P \left( \left\| \frac{1}{n} \sum_{j \in I_k} \widehat{Z}_{k,j} \widehat{Z}_{k,j}^\top - P(\widehat{Z}_k \widehat{Z}_k^\top) \right\| \geq \frac{1}{2} \inf_{g \in \mathcal{G}} \lambda_{\min}(P[Z(g)Z(g)^\top]) \right) = 0.$$

Combining the above, we obtain (30). (31) can be proved in a similar way. □



**Lemma 3.** Let  $\{M_{1n}\}, \{M_{2n}\}, \{M_{3n}\}, \{M_{4n}\}, \{A_n\}, \{B_n\}$  be sequences of random real symmetric matrices of fixed dimension. Assume that with probability 1,  $\lambda_0 := \inf_n \lambda_{\min}(B_n) > 0$ , and  $\|A_n - B_n\| = o_p(1)$ . Moreover, assume that

$$\begin{aligned}\|M_{1n} - A_n\| &= O_p(1/\sqrt{n}), \|M_{3n} - A_n\| = O_p(1/\sqrt{n}), \\ \|M_{2n} - B_n\| &= O_p(1/\sqrt{n}), \|M_{4n} - B_n\| = O_p(1/\sqrt{n}).\end{aligned}$$

If in addition,

$$\sqrt{n}\|M_{1n} + M_{2n} - M_{3n} - M_{4n}\| \rightarrow_p 0,$$

then

$$\sqrt{n}\|M_{1n}^{-1} + M_{2n}^{-1} - M_{3n}^{-1} - M_{4n}^{-1}\| \rightarrow_p 0.$$

*Proof.* Define the event

$$\begin{aligned}E_n := & \{\|A_n - B_n\| \geq \lambda_0/2\} \cup \{\max\{\|M_{1n} - A_n\|, \|M_{3n} - A_n\|\} \geq \lambda_0/2\} \\ & \cup \{\max\{\|M_{2n} - B_n\|, \|M_{4n} - B_n\|\} \geq \lambda_0/2\}.\end{aligned}$$

Then  $\lim_{n \rightarrow \infty} P(E_n) = 0$ . Now on  $E_n^c$ , according to a Neumann series expansion,

$$\begin{aligned}M_{1n}^{-1} &= [A_n + (M_{1n} - A_n)]^{-1} \\ &= A_n^{-1/2}[I - A_n^{-1/2}(M_{1n} - A_n)A_n^{-1/2} + D_{1n}]A_n^{-1/2}.\end{aligned}$$

Here  $D_{1n} = \sum_{j \geq 2} [-A_n^{-1/2}(M_{1n} - A_n)A_n^{-1/2}]^j$ , and we have on  $E_n^c$

$$\begin{aligned}\|D_{1n}\| &\leq \sum_{j \geq 2} \|A_n^{-1/2}(M_{1n} - A_n)A_n^{-1/2}\|^j \\ &\leq \frac{\|A_n^{-1}\|^2 \|M_{1n} - A_n\|^2}{1 - \|A_n^{-1}\| \|M_{1n} - A_n\|} \leq \frac{8}{\lambda_0^2} \|M_{1n} - A_n\|^2.\end{aligned}\tag{32}$$

Here we use the fact that on  $E_n^c$

$$\|A_n^{-1/2}(M_{1n} - A_n)A_n^{-1/2}\| \leq \|A_n^{-1/2}\|^2 \|M_{1n} - A_n\| < \frac{2}{\lambda_0} \cdot \frac{\lambda_0}{2} = 1.$$

Similar expansions hold for  $M_{2n}, M_{3n}$  and  $M_{4n}$ , and we define  $D_{2n}, D_{3n}$  and  $D_{4n}$  accordingly. Using some simple algebra, we deduce that on  $E_n^c$ ,

$$M_{1n}^{-1} + M_{2n}^{-1} - M_{3n}^{-1} - M_{4n}^{-1} = J_{1n} + J_{2n} + J_{3n} + J_{4n},$$

where

$$\begin{aligned}J_{1n} &= -A_n^{-1}[M_{1n} + M_{2n} - M_{3n} - M_{4n}]A_n^{-1}, \\ J_{2n} &= -A_n^{-1}(M_{4n} - M_{2n})A_n^{-1} + B_n^{-1}(M_{4n} - M_{2n})B_n^{-1}, \\ J_{3n} &= A_n^{-1/2}(D_{1n} - D_{3n})A_n^{-1/2}, \\ J_{4n} &= B_n^{-1/2}(D_{2n} - D_{4n})B_n^{-1/2}.\end{aligned}$$

For any  $\epsilon > 0$ ,

$$P(\sqrt{n}\|M_{1n}^{-1} + M_{2n}^{-1} - M_{3n}^{-1} - M_{4n}^{-1}\| > \epsilon) < P(E_n) + \sum_{\ell=1}^4 P(E_n^c \cap \{\sqrt{n}\|J_{\ell n}\| > \epsilon/4\}).\tag{33}$$

Combining the fact that  $\lim_{n \rightarrow \infty} P(E_n) = 0$ , we only need to prove that each of the rest of the terms on the the RHS of (33) has limit 0.

First,  $\lim_{n \rightarrow \infty} P(E_n^c \cap \{\sqrt{n}\|J_{1n}\| > \epsilon/4\}) = 0$  follows from our assumption. For  $J_{2n}$ , observe that  $J_{2n} = J_{2n}^{(1)} + J_{2n}^{(2)}$ , where

$$J_{2n}^{(1)} = (B_n^{-1} - A_n^{-1})(M_{4n} - M_{2n})A_n^{-1}, J_{2n}^{(2)} = B_n^{-1}(M_{4n} - M_{2n})(B_n^{-1} - A_n^{-1}).$$

We bound the limit of  $\|J_{2n}^{(1)}\|$  as follows: For any  $\delta > 0$ , there exists  $M > 0$  such that  $\forall n$ ,  $P(\sqrt{n}\|M_{4n} - M_{2n}\| > M) < \frac{\delta}{2}$ . According to our assumption, there further exists  $N \in \mathbb{N}$  such that for all  $n > N$ ,  $P(\|A_n - B_n\| > \frac{\lambda_0^3 \epsilon}{32M}) < \frac{\delta}{2}$ . Therefore for all  $n > N$ ,

$$\begin{aligned} & P(E_n^c \cap \{\sqrt{n}\|J_{2n}^{(1)}\| > \epsilon/8\}) \\ & \leq P(E_n^c \cap \{\sqrt{n}\|A_n^{-1}(A_n - B_n)B_n^{-1}(M_{4n} - M_{2n})A_n^{-1}\| > \epsilon/8\}) \\ & \leq P(E_n^c \cap \{\|A_n - B_n\| \cdot \sqrt{n}\|M_{4n} - M_{2n}\| > \lambda_0^3 \epsilon/32\}) \\ & \leq P(\sqrt{n}\|M_{4n} - M_{2n}\| > M) + P(\|A_n - B_n\| > \lambda_0^3 \epsilon/(32M)) < \delta. \end{aligned}$$

The above argument implies that  $\lim_{n \rightarrow +\infty} P(E_n^c \cap \{\sqrt{n}\|J_{2n}^{(1)}\| > \epsilon/8\}) = 0$ . Similarly we have  $\lim_{n \rightarrow +\infty} P(E_n^c \cap \{\sqrt{n}\|J_{2n}^{(2)}\| > \epsilon/8\}) = 0$ . Thus

$$\begin{aligned} & \lim_{n \rightarrow +\infty} P(E_n^c \cap \{\sqrt{n}\|J_{2n}\| > \epsilon/4\}) \\ & \leq \lim_{n \rightarrow +\infty} P(E_n^c \cap \{\sqrt{n}\|J_{2n}^{(1)}\| > \epsilon/8\}) + \lim_{n \rightarrow +\infty} P(E_n^c \cap \{\sqrt{n}\|J_{2n}^{(2)}\| > \epsilon/8\}) = 0. \end{aligned}$$

Now we proceed to bound the limit of  $\|J_{3n}\|$ . In fact we have

$$\begin{aligned} & P(E_n^c \cap \{\sqrt{n}\|J_{3n}\| > \epsilon/4\}) \leq P(E_n^c \cap \{\sqrt{n}\|D_{1n} - D_{3n}\| > \epsilon\lambda_0/8\}) \\ & \leq P(E_n^c \cap \{\sqrt{n}\|D_{1n}\| > \epsilon\lambda_0/16\}) + P(E_n^c \cap \{\sqrt{n}\|D_{3n}\| > \epsilon\lambda_0/16\}) \\ & \leq P(\sqrt{n}\|M_{1n} - A_n\|^2 > \epsilon\lambda_0^3/128) + P(\sqrt{n}\|M_{3n} - A_n\|^2 > \epsilon\lambda_0^3/128). \end{aligned}$$

In the last inequality we utilize (32). Combining our assumptions, we have

$$\lim_{n \rightarrow \infty} P(E_n^c \cap \{\sqrt{n}\|J_{3n}\| > \epsilon/4\}) = 0.$$

Similarly

$$\lim_{n \rightarrow \infty} P(E_n^c \cap \{\sqrt{n}\|J_{4n}\| > \epsilon/4\}) = 0.$$

We conclude our proof. □

## References

- [1] CHERNOZHUKOV, Victor ; CHETVERIKOV, Denis ; DEMIRER, Mert ; DUFLO, Esther ; HANSEN, Christian ; NEWAY, Whitney ; ROBINS, James: Double/debiased machine learning for treatment and structural parameters. In: *The Econometrics Journal* 21 (2018), Nr. 1
